# Supplementary material
Source: PubMed Central journal article supplement (PMC2682597)

## Supplemental Figures

### Supp. Figure 1. G-overhang signal in cells expressing myc-Trf1

**A.** Autoradiogram showing native in-gel hybridisations of (TA<sub>2</sub>C<sub>3</sub>)<sub>4</sub> G-strand probe to MspI-, HinfI- and HaeIII-digested genomic DNA from the following cell lines:

Lane 1. wild-type; 2. *Trf1*<sup>-/-</sup>; 3. *Trf1*<sup>-/-</sup> myc-Trf1 clone 1 (PD 200-250); 4. *Trf1*<sup>-/-</sup> myc-Trf1 clone 2 (PD 800-900); 5. wild-type myc-Trf1 (~PD 50-80). Levels of myc-Trf1 are much higher in *Trf1*<sup>-/-</sup> myc-Trf1 clone 2 compared with clone 1.

**B.** Histogram showing relative G-overhang signals. The relative signal in each lane was quantified with a phosphoimager and normalised against a representative band in the TRF signal of the denatured gel. Data represent the s.e.m. of three independent experiments.

**C.** Immunoblot analysis of myc-Trf1 expression in the following cell lines: Lane 1. wild-type; 2. *Trf1*<sup>-/-</sup>; 3. *Trf1*<sup>-/-</sup> myc-Trf1 clone 1; 4. *Trf1*<sup>-/-</sup> myc-Trf1 clone 2; 5. wild-type myc-Trf1. Immunoblot for  $\gamma$ -tubulin is used as a loading control.

### Supp. Figure 2. Telomerase activity in *Trf1* mutant cells.

**A.** A representative TRAP assay performed using 1 $\mu$ g protein extract from the following cells: lane 2. wild-type; 4. *Trf1*<sup>-/-</sup> myc-Trf1<sup>+</sup>; 5. *Trf*<sup>+/+/-</sup>; 6. *Trf*<sup>+/-/-</sup>; 7. *Trf1*<sup>-/-</sup> PD12; 8. *Trf1*<sup>-/-</sup> PD360. An intra-assay PCR internal control is indicated ('IC').

Negative control reactions involved 1. the use of water in the extension reaction instead of telomerase extract or 3. the omission of Taq polymerase.

**B.** A representative TRAP assay showing titration of wildtype extract. Lane 1. wild-type 2 $\mu$ g; 2. wildtype 1 $\mu$ g; 3. wildtype 0.5 $\mu$ g; 4. no telomerase extract; 5. no Taq polymerase.

C. Histogram showing telomerase activity in the indicated cell lines. Data represent the mean values +/- standard deviation of at least three independent TRAP experiments.

**Supp. Figure 3. DNA damage response induced by electroporation of *Trf1*<sup>-/-</sup> cells**

Wild-type or *Trf1*-deficient cells were either untreated or transfected with 10 µg of linearised plasmid DNA, as indicated and immunoblot analysis of H2AX phosphorylation performed 12 h post-electroporation. Plasmids transfected were pCMV-3myc (empty vector), or pCMV-3myc into which was cloned full-length chicken *Trf2*, or chicken *Trf2* deleted in the regions encoding the basic domain and the myb homology domain ( $\Delta$ BAM). Size markers are shown at left in kDa and immunoblot for actin was used as a loading control.

**A**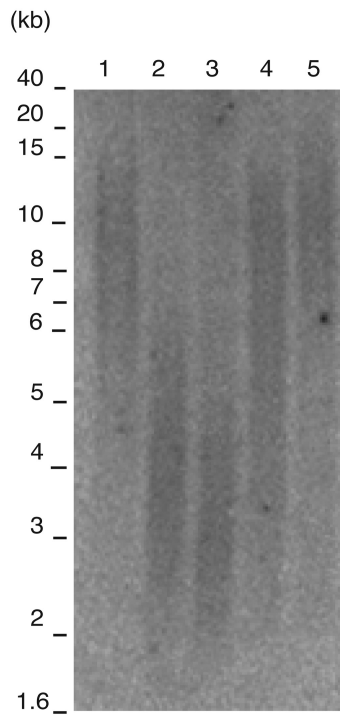**B**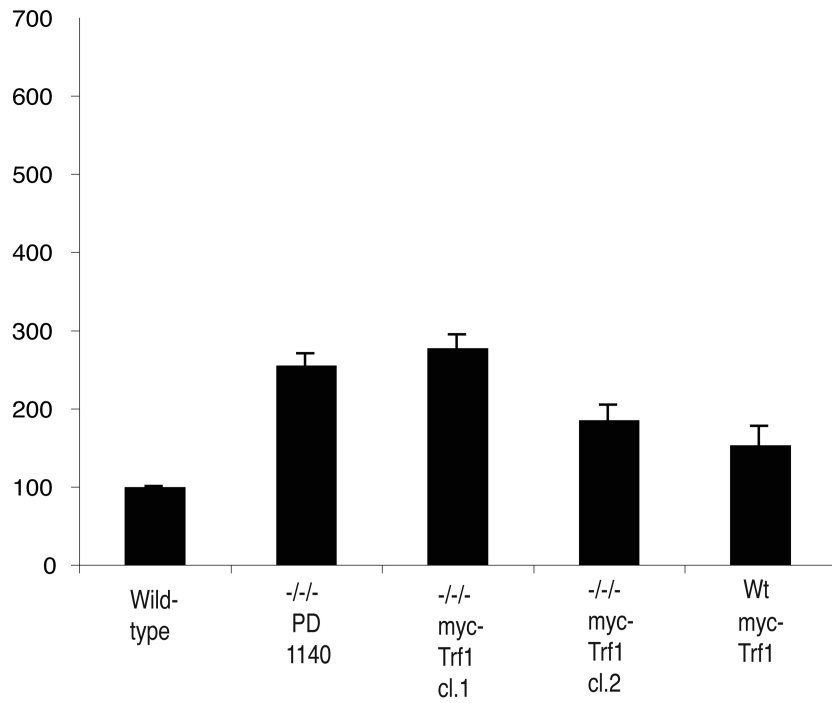**C**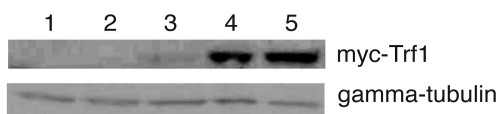

A

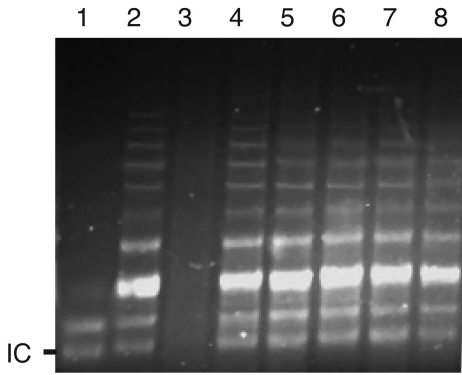

B

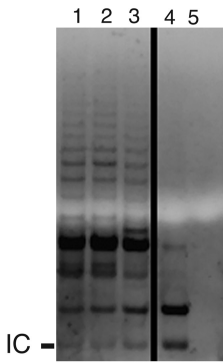

C

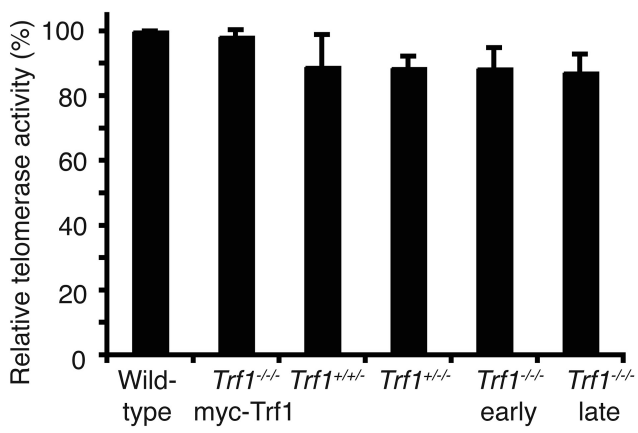

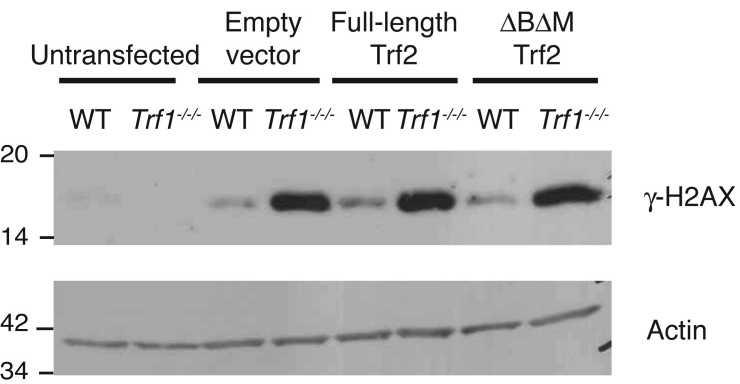

Supplement: E08-10-1019_1.pdf [file E08-10-1019_1.pdf]
